# Supplementary material for: Intra-myocellular lipid enrichment of differentiated bovine satellite cells through beef-like fatty acid mixtures
Source: Royal Society of Chemistry journal article supplement (doi:10.1039/d5fb00506j), 2025-12-01

# Supplementary Fig S1

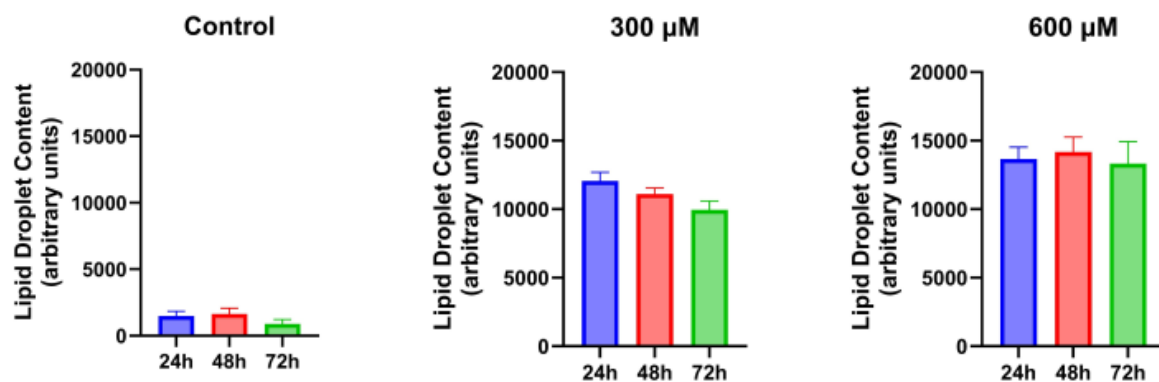

# Supplementary Fig S2

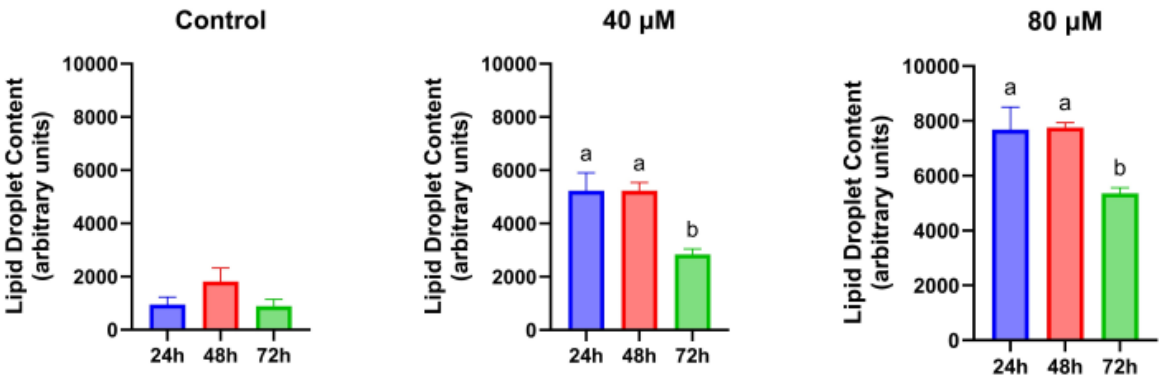

Supplementary Fig  
S3

Control

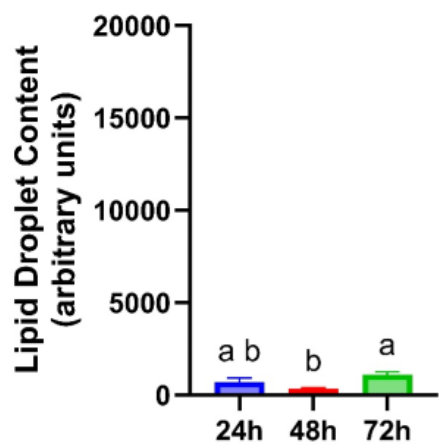

82,5  $\mu$ M

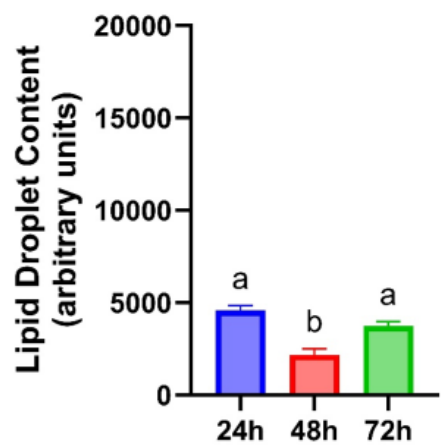

165  $\mu$ M

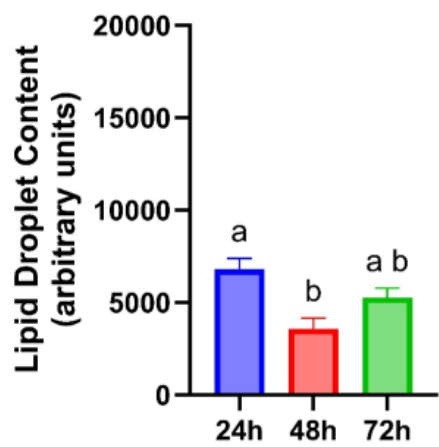

330  $\mu$ M

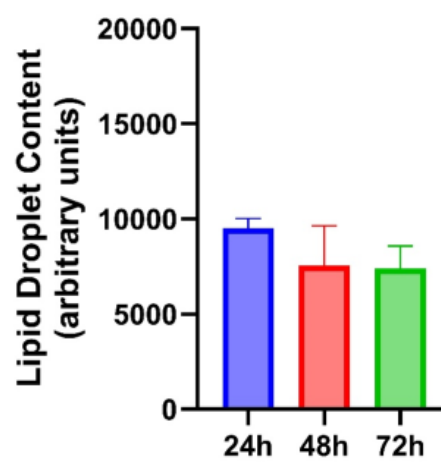

660  $\mu$ M

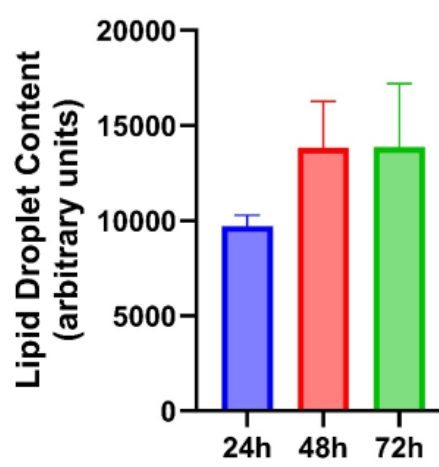

1320  $\mu$ M

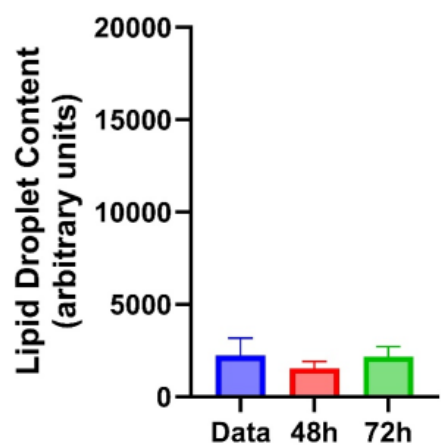

Supplementary Fig  
S4

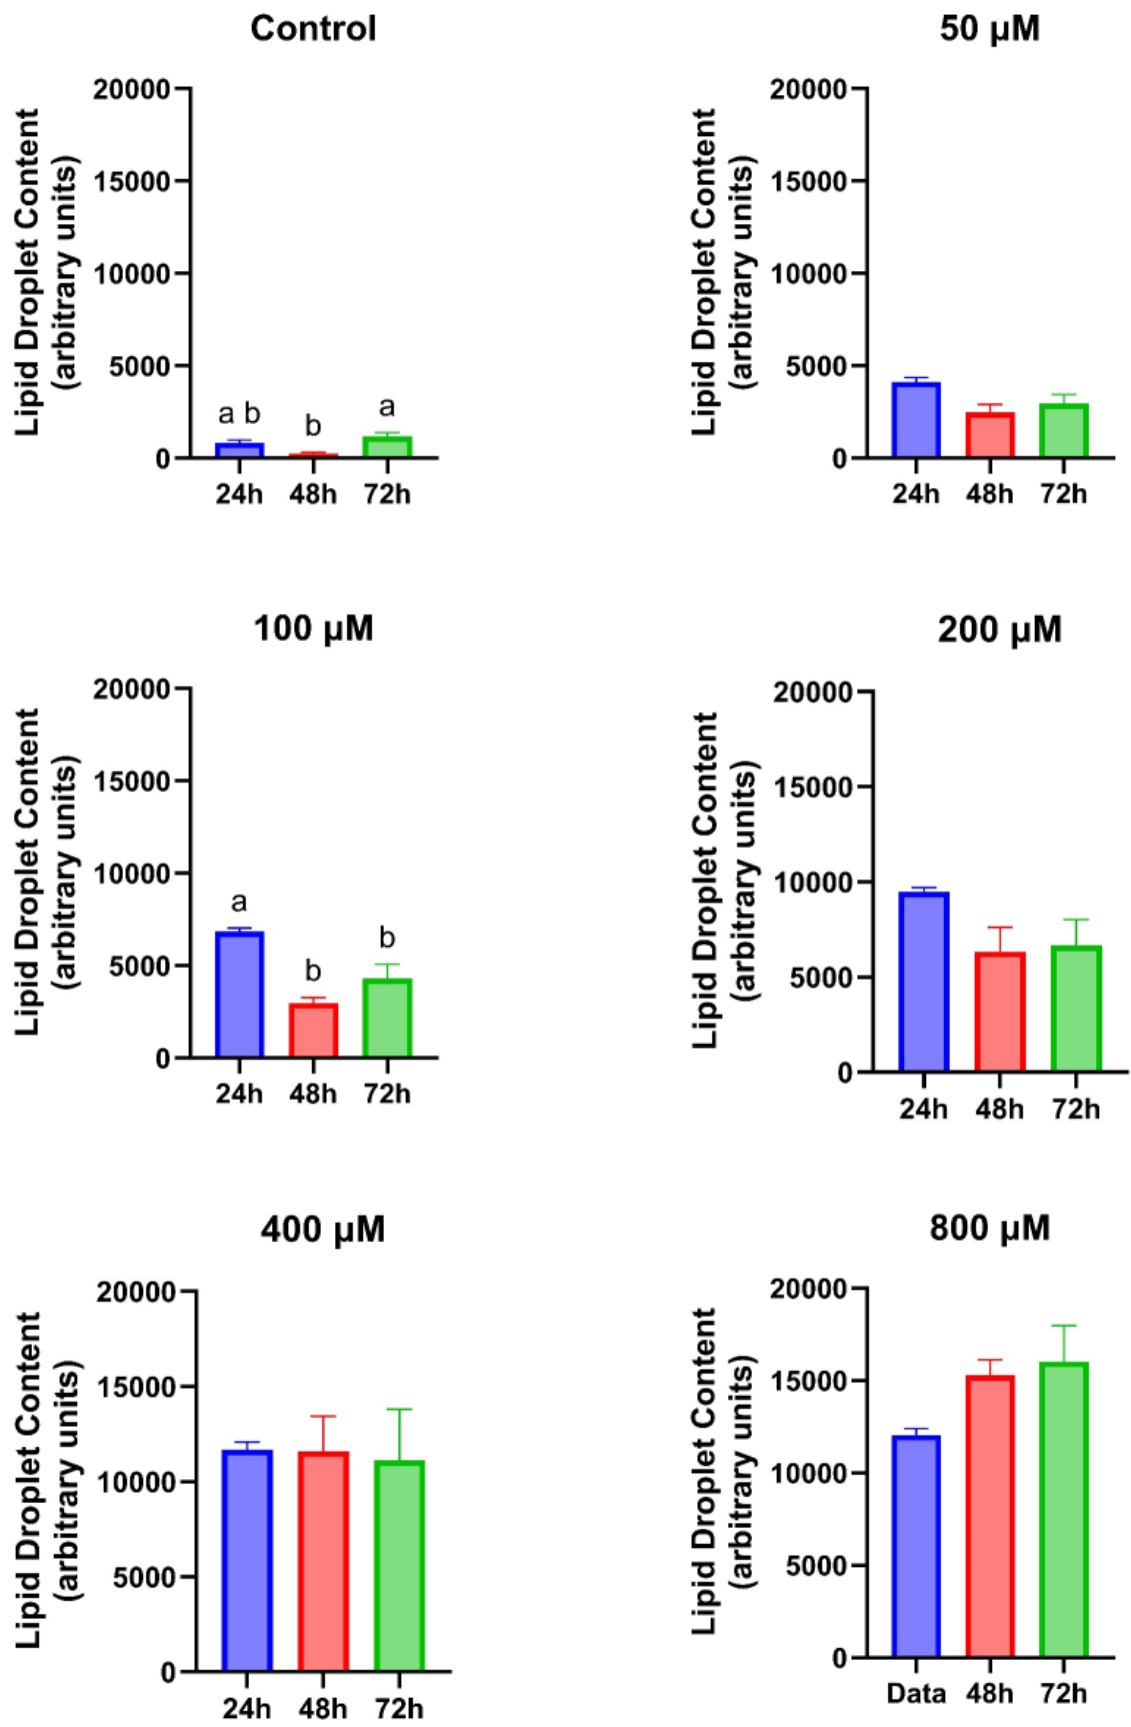

Supplement: d5fb00506j1.pdf [file d5fb00506j1.pdf]
